1 **The long arm of childhood socioeconomic deprivation on mid- to later-life cognitive trajectories: A**  
2 **cross-cohort analysis**

3

4 Authors:

5 Ruby S. M. Tsang (ruby.tsang@phc.ox.ac.uk)

6 John E. Gallacher (john.gallacher@psych.ox.ac.uk)

7 Sarah Bauermeister (sarah.bauermeister@psych.ox.ac.uk)

8

9 Affiliation:

10 Department of Psychiatry, University of Oxford, Warneford Hospital, Oxford OX3 7JX, United

11 Kingdom

12

13 Corresponding author:

14 Sarah Bauermeister

15 Department of Psychiatry

16 University of Oxford

17 Warneford Hospital

18 Oxford, OX3 7JX

19 UK

20

21 Declarations of interest: None

22

23 **Research in context**

- 24 1. Systematic review: We reviewed the literature on childhood socioeconomic status (SES) as a  
25 predictor for cognitive decline in mid- to later-life using PubMed. Studies generally reported  
26 lower childhood SES is associated with poorer baseline cognition, but not a faster rate of decline.  
27 These studies generally focused on the mean rate of decline in the population; no study to date  
28 has explored associations between childhood SES and different cognitive trajectories. Relevant  
29 studies have been appropriately cited.
- 30 2. Interpretation: Our findings suggest that cognitive trajectories differ between individuals and  
31 across cognitive domains. Individuals of lower childhood SES were more likely to be in a lower  
32 cognitive trajectory class, which may or may not involve more rapid decline.
- 33 3. Future directions: Future studies should include more cognitive outcomes and longer follow-ups,  
34 as well as investigate the impact of social mobility to further improve our understanding on how  
35 early-life circumstances influence cognitive decline.

36

76

77 **Abstract**

78 INTRODUCTION: Earlier studies of the effects of childhood socioeconomic status (SES) on later life  
79 cognitive function consistently report a social gradient in later life cognitive function. Evidence for  
80 their effects on cognitive decline is, however, less clear.

81 METHODS: The sample consists of 5,324 participants in the Whitehall II Study, 8,572 in the Health  
82 and Retirement Study, and 1,413 in the Kame Project, who completed self-report questionnaires on  
83 their early-life experiences and underwent repeated cognitive assessments. We characterised  
84 cognitive trajectories using latent class mixed models, and explored associations between childhood  
85 SES and latent class membership using logistic regressions.

86 RESULTS: We identified distinct trajectories classes for all cognitive measures examined. Childhood  
87 socioeconomic deprivation was associated with an increased likelihood of being in a lower trajectory  
88 class.

89 DISCUSSION: Our findings support the notions that cognitive ageing is a heterogeneous process and  
90 early-life circumstances may have lasting effects on cognition across the life-course.

91

92 **Keywords:** cognitive ageing; cognitive decline; longitudinal studies; latent class mixed models;  
93 childhood socioeconomic status

94

95 **1. INTRODUCTION**

96 Childhood adversity is known to have profound effects on cognitive development [1], with cognitive  
97 deficits or delays reported in childhood and adolescence among those who were exposed to  
98 childhood adversity [2]. Current conceptualisation of the neurodevelopmental effects of childhood  
99 adversity suggests that exposure to childhood adversity results in the dysregulation of the  
100 hypothalamic-pituitary-adrenal (HPA) axis. The HPA axis is activated and glucocorticoids are released  
101 in face of stressful experiences. With childhood adversity, the brain is exposed to prolonged periods  
102 of excessive glucocorticoids release during sensitive periods of development, which may result in  
103 lasting structural and functional changes in the brain. In addition to the HPA axis, other mechanisms  
104 such as the immune system, the microbiome as well as epigenetic alterations may also play a role in  
105 the detrimental health effects linked to child adversity [3, 4].

106

107 Given that later life cognitive function is to a great extent determined by childhood cognition [5], it  
108 has been hypothesised that the impact of childhood adversity may persist into later life, and one of  
109 the most frequently studied form of childhood adversity in ageing studies is childhood  
110 socioeconomic deprivation. Studies consistently report a social gradient in absolute later life  
111 cognitive function, with lower childhood socioeconomic status (SES) associated with poorer global  
112 cognition [6-13], memory [11, 12, 14-18], verbal fluency [17, 18], language [11], processing speed  
113 [11, 16], visuospatial abilities [11] and executive function [12] in mid- to later life. However, the  
114 literature on whether childhood SES is associated with cognitive decline is largely inconsistent. While  
115 the majority did not find an association [6, 7, 9-11, 13, 15-17, 19, 20], the few exceptions reported  
116 associations in opposite directions. For instance, one study reported that higher childhood SES was  
117 associated with slower global cognitive decline, but not with decline in specific cognitive  
118 components (episodic memory, semantic memory, and executive function) [14, 21], whereas  
119 another found that higher childhood SES was associated with faster cognitive decline [18]. Other  
120 factors such as race or sex may also modify the association. While being very poor or having poor  
121 health in childhood were not associated with faster cognitive decline, not having enough food to eat  
122 and being thinner than average in childhood were associated with slower global cognitive decline  
123 among African Americans; these effects were not observed in the Caucasians [8]. Furthermore, men  
124 in the middle childhood SES group showed faster decline in processing speed, whereas women in the  
125 low childhood SES group showed slower decline in memory and global cognition [12].

126

127 In addition, the validity of the inferences made are dependent on the validity of underlying  
128 assumptions of the models used. Studies exploring the relationships between childhood SES and

129 cognitive decline traditionally used mixed effects or growth curve models, both of which estimate an  
130 overall mean trajectory for the entire sample and individual variation around this mean trajectory  
131 [22]. However, more recently, there is increasing evidence to suggest cognitive ageing is a  
132 heterogeneous process and distinct subgroups of trajectories exist between individuals and across  
133 cognitive domains [23, 24]. For this reason, the use of mixed effects or growth curve models may not  
134 be the most appropriate methods for modeling cognitive decline and its relationship with childhood  
135 SES.

136

137 The aim of this study is to obtain further insights into the relationship between childhood SES and  
138 cognitive decline in mid- to later life. We seek to first identify latent classes of cognitive trajectories,  
139 and then examine the predictive utility of childhood SES indicators on class membership using  
140 secondary data from three ageing cohorts, namely the Whitehall II Study [25], the Health and  
141 Retirement Study (HRS) [26] and the Kame Project [27].

142

## 143 **2. METHODS**

### 144 2.1. Cohort and study sample selection

145 Cohort selection was undertaken using the Dementias Platform UK (DPUK) Data Discovery tools. Our  
146 inclusion criteria were studies with:

- 147 (1) Participants aged 50 years and above;
- 148 (2) Cognitive data from three or more assessment points using the same instrument(s);
- 149 (3) Childhood SES data; and
- 150 (4) The data were already available to access on the DPUK Data Portal at the time [28].

151 We then investigated whether data from cohorts on other platforms may be appropriate for this  
152 study, and the relevant data were uploaded to the DPUK Data Portal with permission.

153

154 Following the aforementioned selection procedure, the Whitehall II Study, the HRS and the Kame  
155 Project were included in this study. Participants with data in at least half of the selected data  
156 collection waves were included in the analyses. Since only those aged over 65 years in HRS and over  
157 60 years in the Kame Project completed the cognitive tests of interest, samples were restricted to  
158 those who were older than these respective age cut-offs. Participants in all three cohorts provided  
159 written informed consent at the time of data collection.

160

### 161 2.2. Cognitive outcomes

162 In the Whitehall II Study, cognitive data were taken from phases 7, 9, 11 and 12. Global cognition  
163 was assessed with the Mini-Mental State Examination (MMSE) [29], verbal memory with a 20-word  
164 free recall, and fluency with a 60-second written naming task of words beginning with the letter “S”.  
165 In HRS, cognitive data were taken from years 2010 to 2016. Global cognition was assessed with a  
166 modified version of the Telephone Interview for Cognitive Status (TICS-M) [30], which includes items  
167 that assess memory, attention, orientation and language, and fluency with a 60-second verbal  
168 animal naming task. In Kame, cognitive data were from the first five visits, and global cognition was  
169 assessed using the MMSE.

170

### 171 2.3. Childhood SES indicators

172 Participants in the three cohorts completed self-report questionnaires that included items that  
173 reflect childhood SES. The items varied between the cohorts, but covered aspects including parental  
174 education, parental unemployment and family financial hardship. The full list of these items and  
175 details on the variable coding are presented in Table A1 in the Appendix.

176

### 177 2.4. Covariates

178 Covariates that were tested in the models include age at the selected baseline, sex and years of  
179 education.

180

### 181 2.5. Statistical analyses

182 Latent class mixed models were used to identify subgroups of participants with similar cognitive  
183 performance across time. This was performed using the *lcmm* package version 1.7.8 [31] in R version  
184 3.5.3. In these models, a latent class model is used to identify latent subgroups of individuals based  
185 on their trajectories and a mixed model is used to describe the mean trajectory within each  
186 subgroup simultaneously. The main underlying assumption is that the population is heterogeneous  
187 and composed of multiple latent classes with their own respective mean profiles of trajectories.  
188 These models attempt to explain the dependent variable (cognition in this case) as a function of time  
189 at the population level (fixed component), the class-specific level (mixture component), and the  
190 individual level (random component).

191

192 We used a data-driven approach adapted from methods used by Carrière et al. [32]. All models used  
193 a beta cumulative distribution function transformation to address skewness in the data. We first  
194 estimated the cognitive trajectories without adjustment for baseline covariates, then sequentially  
195 increased model complexity (intercept-only, linear or quadratic time effects for fixed, mixture and

196 random effects, and from one to three latent classes). For each cognitive outcome, a total of 34  
197 models were tested (see Table A2 in the Appendix). Goodness-of-fit was assessed based on model  
198 convergence, Bayesian information criterion (BIC), and average posterior probabilities (AvePP).  
199 Lower estimates of BIC indicate better model fit, and AvePP >0.7 for all trajectory classes indicate  
200 high accuracy in class assignment [33]. Then, covariates were introduced into the class-membership  
201 model in separate baseline age-adjusted models, and those with a *p*-value <0.20 were included in  
202 the final model. Where the final model either failed to converge or returned a smallest class being  
203 <1% of the sample, the model with the next lowest BIC value and AvePP >0.7 for all identified classes  
204 would be tested for covariates, and so forth.

205

206 After participants were classified into subgroups, logistic regressions were carried out separately  
207 with each childhood SES indicator as the predictor of class membership in Stata/SE 15.1. We  
208 accounted for multiple comparisons using the Benjamini-Hochberg procedure [34], with the false  
209 discovery rate controlled at 0.05.

210

211 All analyses were carried out in the DPUK Data Portal [28].

212

### 213 **3. RESULTS**

214 Descriptive statistics of the included participants from the three cohorts are presented in Table 1.

215

#### 216 3.1. Characterisation of cognitive trajectories

##### 217 3.1.1. Whitehall II Study

218 In the Whitehall II Study, the best-fitting model for all three cognitive measures showed quadratic  
219 decline in the fixed and mixture components; however, they differed in the random component  
220 where there was no decline in global cognition but linear decline in fluency and memory (Table 2).  
221 Three trajectory classes were identified for global cognition and fluency, and two for memory. The  
222 patterns of trajectories appeared to be different across cognitive domains. The three global  
223 cognition classes correspond to a resilient/stable trajectory, a gradual decline trajectory, and a  
224 relatively rapid decline trajectory (Figure 1a). The three fluency classes identified represent a  
225 resilient/stable trajectory, a gradual decline trajectory, and a curvilinear trajectory showing an initial  
226 improvement followed by rapid decline (Figure 1b). The two memory classes identified both showed  
227 decline over time (Figure 1c).

228

##### 229 3.1.2. Health and Retirement Study

230 The best-fitting model for both global cognition and fluency in HRS showed quadratic decline in the  
231 fixed and mixture components, and linear decline in the random component (Table 2). Both models  
232 identified three trajectory classes. The three global cognition classes all showed gradual decline  
233 (Figure 1d), whereas two of the three fluency classes showed gradual decline, and the third showed  
234 some initial improvement followed by rapid decline (Figure 1e).

235

### 236 3.1.3. Kame Project

237 Similar to most of the other cognitive measures examined, the best-fitting model for global cognition  
238 in the Kame Project showed quadratic decline in the fixed and mixture components, and linear  
239 decline in the random component. The two trajectory classes correspond to a resilient/stable  
240 trajectory and a gradual decline trajectory (Figure 1f).

241

### 242 3.2. Associations between exposure to early adversity and class membership

243 Using Class 1 as the reference group, it appeared that among the childhood SES indicators examined,  
244 almost all showed an association between lower childhood SES and increased likelihood of  
245 membership in a lower trajectory class (Table 3).

246

247 In the Whitehall II Study, older age when father completed full-time education, older age when  
248 mother completed full-time education, higher father's social class and family car ownership were  
249 consistently associated with a decreased likelihood of being in a lower trajectory class across  
250 cognitive domains, while ongoing family financial problems, and not having an inside toilet in the  
251 household were associated with an increased likelihood of being in a lower trajectory class. Having  
252 spent four or more weeks in hospital and parental unemployment were associated with a higher  
253 likelihood of being in a lower trajectory class in two out of three cognitive outcomes. There was  
254 limited evidence for an association between childhood SES and class membership in the small  
255 trajectory class with initial learning effects followed by rapid decline in the fluency task.

256

257 Similarly, almost all childhood SES indicators examined were associated with an increased likelihood  
258 of membership in a lower trajectory class in the HRS. Higher father's education, higher mother's  
259 education, better childhood health were consistently associated with a decreased likelihood of being  
260 in a lower trajectory class. Worse family financial status, family having moved due to financial  
261 difficulties, and father's unemployment were related to an increased likelihood of being in a lower  
262 trajectory class. Again, there was limited evidence for an association between childhood SES and



263 class membership in the trajectory class with initial learning effects followed by rapid decline in the  
264 fluency task.

265

266 The results from Kame, however, present a mixed picture. On one hand, higher father's education,  
267 higher mother's education, and urban/suburban living were linked to a lower likelihood of being in  
268 the lower trajectory class. On the other hand, household density and family financial situation were  
269 not associated with the likelihood of being in the lower trajectory class.

270

#### 271 **4. DISCUSSION**

272 The primary aim of this study is to explore the relationship between childhood SES and mid- to late-  
273 life cognitive trajectories. Using longitudinal data from three cohorts, we characterised latent  
274 cognitive trajectories, and examined associations between childhood SES indicators and cognitive  
275 trajectory class membership. We found: (i) there were multiple trajectory classes in all of the  
276 cognitive outcomes included in this study, and (ii) lower childhood SES is consistently associated with  
277 an increased likelihood of being in a lower trajectory class.

278

279 Earlier studies that examined cognitive ageing or cognitive decline typically used statistical methods  
280 that assume there is one mean trajectory within the population. In contrast to these studies, we  
281 found that there are multiple latent trajectory classes, but the profiles observed differed between  
282 cohorts and across cognitive domains. This provides further support for the notion that cognitive  
283 ageing is a heterogeneous process, with between- and within-cohort variation. It is important to  
284 note that for certain cognitive outcomes (e.g., memory in the Whitehall II Study and TICS-M in HRS),  
285 the slopes of the different predicted trajectories appeared rather similar, suggesting that rates of  
286 cognitive decline may not vary substantially.

287

288 An interesting finding in the patterns of cognitive trajectories observed, was that in the fluency tasks  
289 in both the Whitehall II Study and HRS, there was a small class that showed a curvilinear trajectory  
290 showing initial improvements followed by more rapid decline. These initial improvements may  
291 reflect practice effects from repeated administration of cognitive assessments. Studies have found  
292 considerable practice effects even when assessments were conducted several years apart, and such  
293 short-term improvements are often large enough to counteract age-related cognitive decline [35].

294 While it may seem counterintuitive that those who will eventually be cognitively impaired in fact  
295 show greater practice effects, one explanation is that these individuals were performing below their  
296 actual cognitive potential when they first encounter novel cognitive tests, as they need more time to

297 understand the task demands. As they familiarise themselves with the task characteristics, they then  
298 exhibit a “rebound” in their performance (i.e., a “novelty effect”) [36, 37]. Thorgusen and colleagues  
299 [38] demonstrated that both memory and novelty effects uniquely contribute towards these  
300 neuropsychological practice effects, and cognitive impairment is more likely to be associated with  
301 smaller practice effects in memory tasks, but larger practice effects in tasks assessing other cognitive  
302 domains. It has been proposed that such novelty effect may be a useful early marker of declining  
303 cognitive reserve and neurodegeneration, but more research is required to understand how practice  
304 effects differ depending on the population, task complexity, and cognitive domain assessed before  
305 conclusions can be drawn about their potential diagnostic and prognostic utility.

306

307 Our results suggest that childhood SES is an important contributor to mid- to later-life cognitive  
308 trajectories. Level of education is often used as a measure of early-life SES; there is consistent  
309 evidence that education plays an important role on later-life cognitive function and cognitive decline  
310 [39-41], but few studies have examined the effects of other measures of childhood SES, especially on  
311 cognitive decline. This paper adds to the literature by including a range of childhood SES indicators,  
312 and examining their associations with cognitive trajectories. Major strengths of this study also  
313 include larger sample sizes than earlier studies, and the cross-cohort comparisons also showed that  
314 the associations between childhood SES indicators and different cognitive trajectory classes were  
315 robust across cohorts and cognitive domains. The finding that there are distinct latent trajectory  
316 classes that may not necessarily differ in their slopes also help explain some of the inconsistencies in  
317 earlier studies that while most studies reported no association between childhood SES and rate of  
318 cognitive decline [6, 7, 9-11, 13, 15-17, 19, 20], a few others found associations in opposite  
319 directions [14, 18, 21].

320

321 These findings have implications for the prevention of cognitive impairment and dementia. Globally,  
322 the number of people living with dementia is rapidly increasing, but there is currently no cure and no  
323 treatment that alters the course of the disease. Delaying or preventing the onset of dementia is  
324 therefore a key public health priority. Our analyses showed that the main difference between latent  
325 trajectory classes generally lies in their baseline cognitive function, and lower childhood SES is  
326 consistently associated with the lower trajectory classes. This suggests that childhood SES is an  
327 important contributor to cognitive reserve, and interventions aimed at reducing socioeconomic  
328 inequalities may be effective in delaying or preventing the onset of dementia. Furthermore, studies  
329 using a life-course approach have demonstrated that SES at different life stages each make unique  
330 contributions to cognitive function in mid- to later-life, and upward social mobility later in life may to

331 a certain extent counteract the negative effects of disadvantaged childhood SES [42, 43]. Whether  
332 upward social mobility later in life influences mid- to later-life cognitive decline remains to be  
333 investigated.

334

335 Finally, some theoretical and methodological issues should be addressed. First, observable cognitive  
336 change across time is partly dependent on the psychometric properties of the cognitive instruments  
337 used. For instance, MMSE is known to have a strong ceiling effect [44] and shows poor sensitivity to  
338 change in the tails of the distribution [45, 46]. The curvilinear nature of the instrument means that a  
339 one-point change in the higher range of scores do not hold the same clinical meaning as a one-point  
340 change in the medium or lower range, it is possible that cognitive scores may need to be  
341 appropriately transformed before a fair comparison can be made between the slopes of modelled  
342 cognitive trajectories.

343

344 Second, the magnitude of cognitive change observed is somewhat dependent on the length and  
345 frequency of follow-up, as well as the demographic characteristics of the sample. We modelled  
346 cognitive decline over four waves of data in both the Whitehall II Study and HRS, and five waves in  
347 the Kame Project. However, this corresponds to around 12, six and eight years in the respective  
348 studies. Such difference in follow-up durations likely explains the more evident cognitive decline  
349 observed in the Whitehall II Study compared to the other two cohorts. Moreover, the three cohorts  
350 exhibit large demographic differences between them, while the Whitehall II Study is a cohort of  
351 British civil servants, the HRS is a longitudinal panel study that surveyed a representative sample in  
352 the United States, and the Kame Project is a cohort of older Japanese Americans in the United States.  
353 These sampling differences have resulted in differences in the age and sex distributions within the  
354 cohorts, as well as differences in the level of education of the participants, which may all have  
355 effects on cognitive ageing trajectories.

356

357 In summary, different patterns of cognitive decline were observed between cohorts and across  
358 cognitive domains, and lower childhood SES generally predicted membership in a lower cognitive  
359 trajectory class. Future research may benefit from examining trajectories using different cognitive  
360 instruments with better psychometric properties as well as assess more cognitive domains than  
361 what we have examined here, including data from longer follow-ups, and exploring the influence of  
362 social mobility on mid- to later-life cognitive trajectories.

363

364 **Acknowledgements**

365 Funding: RT was supported by Dementias Platform UK (DPUK) and all analyses were conducted on  
366 the DPUK Data Portal. This study was conducted under DPUK Study 0144 as part of the Early  
367 Adversity and Dementia Research Programme. The Medical Research Council supports DPUK  
368 through grant MR/L023784/2.

369

370 **References**

- 371 [1] Pechtel P, Pizzagalli DA. Effects of early life stress on cognitive and affective function: an  
372 integrated review of human literature. *Psychopharmacology*. 2011;214:55-70.
- 373 [2] Oh DL, Jerman P, Silvério Marques S, Koita K, Purewal Boparai SK, Burke Harris N, et al.  
374 Systematic review of pediatric health outcomes associated with childhood adversity. *BMC Pediatrics*.  
375 2018;18:83.
- 376 [3] Berens AE, Jensen SKG, Nelson CA. Biological embedding of childhood adversity: from  
377 physiological mechanisms to clinical implications. *BMC Medicine*. 2017;15:135.
- 378 [4] McLaughlin KA, Sheridan MA, Lambert HK. Childhood adversity and neural development:  
379 Deprivation and threat as distinct dimensions of early experience. *Neuroscience & Biobehavioral*  
380 *Reviews*. 2014;47:578-91.
- 381 [5] Deary IJ, Whiteman MC, Starr JM, Whalley LJ, Fox HC. The impact of childhood intelligence on  
382 later life: following up the Scottish mental surveys of 1932 and 1947. *Journal of Personality and*  
383 *Social Psychology*. 2004;86:130-47.
- 384 [6] Everson-Rose SA, Mendes de Leon CF, Bienias JL, Wilson RS, Evans DA. Early Life Conditions and  
385 Cognitive Functioning in Later Life. *American Journal of Epidemiology*. 2003;158:1083-9.
- 386 [7] Brown MT. Early-Life Characteristics, Psychiatric History, and Cognition Trajectories in Later Life.  
387 *The Gerontologist*. 2010;50:646-56.
- 388 [8] Barnes LL, Wilson RS, Everson-Rose SA, Hayward MD, Evans DA, Mendes de Leon CF. Effects of  
389 early-life adversity on cognitive decline in older African Americans and whites. *Neurology*.  
390 2012;79:2321.
- 391 [9] González HM, Tarraf W, Bowen ME, Johnson-Jennings MD, Fisher GG. What Do Parents Have to  
392 Do with My Cognitive Reserve Life Course Perspectives on Twelve-Year Cognitive Decline.  
393 *Neuroepidemiology*. 2013;41:101-9.
- 394 [10] Lyu J, Burr JA. Socioeconomic Status Across the Life Course and Cognitive Function Among Older  
395 Adults: An Examination of the Latency, Pathways, and Accumulation Hypotheses. *Journal of Aging*  
396 *and Health*. 2016;28:40-67.
- 397 [11] Ericsson M, Lundholm C, Fors S, Dahl Aslan AK, Zavala C, Reynolds CA, et al. Childhood social  
398 class and cognitive aging in the Swedish Adoption/Twin Study of Aging. *Proceedings of the National*  
399 *Academy of Sciences*. 2017;114:7001.
- 400 [12] Zaninotto P, Batty GD, Allerhand M, Deary IJ. Cognitive function trajectories and their  
401 determinants in older people: 8 years of follow-up in the English Longitudinal Study of Ageing.  
402 *Journal of Epidemiology and Community Health*. 2018;72:685.

- 403 [13] Sha T, Yan Y, Cheng W. Associations of childhood socioeconomic status with mid-life and late-  
404 life cognition in Chinese middle-aged and older population based on a 5-year period cohort study.  
405 *International Journal of Geriatric Psychiatry*. 2018;33:1335-45.
- 406 [14] Melrose RJ, Brewster P, Marquine MJ, MacKay-Brandt A, Reed B, Farias ST, et al. Early Life  
407 Development in a Multiethnic Sample and the Relation to Late Life Cognition. *The Journals of*  
408 *Gerontology: Series B*. 2015;70:519-31.
- 409 [15] Staff RT, Chapko D, Hogan MJ, Whalley LJ. Life course socioeconomic status and the decline in  
410 information processing speed in late life. *Social Science & Medicine*. 2016;151:130-8.
- 411 [16] Davis D, Bendayan R, Muniz Terrera G, Hardy R, Richards M, Kuh D. Decline in Search Speed and  
412 Verbal Memory Over 26 Years of Midlife in a British Birth Cohort. *Neuroepidemiology*. 2017;49:121-  
413 8.
- 414 [17] Cermakova P, Formanek T, Kagstrom A, Winkler P. Socioeconomic position in childhood and  
415 cognitive aging in Europe. *Neurology*. 2018;91:e1602-e10.
- 416 [18] Aartsen MJ, Cheval B, Sieber S, Van der Linden BW, Gabriel R, Courvoisier DS, et al. Advantaged  
417 socioeconomic conditions in childhood are associated with higher cognitive functioning but stronger  
418 cognitive decline in older age. *Proceedings of the National Academy of Sciences*. 2019;116:5478.
- 419 [19] Lee S, Kawachi I, Berkman LF, Grodstein F. Education, Other Socioeconomic Indicators, and  
420 Cognitive Function. *American Journal of Epidemiology*. 2003;157:712-20.
- 421 [20] Ritchie SJ, Tucker-Drob EM, Cox SR, Corley J, Dykiert D, Redmond P, et al. Predictors of ageing-  
422 related decline across multiple cognitive functions. *Intelligence*. 2016;59:115-26.
- 423 [21] Brewster PWH, Melrose RJ, Marquine MJ, Johnson JK, Napoles A, MacKay-Brandt A, et al. Life  
424 experience and demographic influences on cognitive function in older adults. *Neuropsychology*.  
425 2014;28:846-58.
- 426 [22] McNeish D, Matta T. Differentiating between mixed-effects and latent-curve approaches to  
427 growth modeling. *Behavior Research Methods*. 2018;50:1398-414.
- 428 [23] Hayden KM, Reed BR, Manly JJ, Tommet D, Pietrzak RH, Chelune GJ, et al. Cognitive decline in  
429 the elderly: an analysis of population heterogeneity. *Age and Ageing*. 2011;40:684-9.
- 430 [24] Goh JO, An Y, Resnick SM. Differential trajectories of age-related changes in components of  
431 executive and memory processes. *Psychol Aging*. 2012;27:707-19.
- 432 [25] Marmot M, Brunner E. Cohort Profile: The Whitehall II study. *International Journal of*  
433 *Epidemiology*. 2005;34:251-6.
- 434 [26] Sonnega A, Faul JD, Ofstedal MB, Langa KM, Phillips JW, Weir DR. Cohort Profile: the Health and  
435 Retirement Study (HRS). *International Journal of Epidemiology*. 2014;43:576-85.

- 436 [27] Graves AB, Larson EB, Edland SD, Bowen JD, McCormick WC, MCCurry SM, et al. Prevalence of  
437 Dementia and Its Subtypes in the Japanese American Population of King County, Washington State:  
438 The Kame Project. *American Journal of Epidemiology*. 1996;144:760-71.
- 439 [28] Bauermeister S, Orton C, Thompson S, Barker RA, Bauermeister JR, Ben-Shlomo Y, et al. The  
440 Dementias Platform UK (DPUK) Data Portal. *European Journal of Epidemiology*. 2020.
- 441 [29] Folstein MF, Folstein SE, McHugh PR. "Mini-mental state": A practical method for grading the  
442 cognitive state of patients for the clinician. *Journal of Psychiatric Research*. 1975;12:189-98.
- 443 [30] Brandt J, Spencer M, Folstein M. The Telephone Interview for Cognitive Status. *Cognitive and*  
444 *Behavioral Neurology*. 1988;1:111-8.
- 445 [31] Proust-Lima C, Philipps V, Liqueur B. Estimation of Extended Mixed Models Using Latent Classes  
446 and Latent Processes: The R Package lcmm. *Journal of Statistical Software*. 2017;78:56.
- 447 [32] Carrière I, Farré A, Proust-Lima C, Ryan J, Ancelin ML, Ritchie K. Chronic and remitting  
448 trajectories of depressive symptoms in the elderly. Characterisation and risk factors. *Epidemiology*  
449 *and Psychiatric Sciences*. 2016;26:146-56.
- 450 [33] Nagin DS. *Group-Based Modeling of Development*: Harvard University Press; 2005.
- 451 [34] Benjamini Y, Hochberg Y. Controlling the False Discovery Rate: A Practical and Powerful  
452 Approach to Multiple Testing. *Journal of the Royal Statistical Society: Series B (Methodological)*.  
453 1995;57:289-300.
- 454 [35] Rabbitt P, Diggle P, Smith D, Holland F, McInnes L. Identifying and separating the effects of  
455 practice and of cognitive ageing during a large longitudinal study of elderly community residents.  
456 *Neuropsychologia*. 2001;39:532-43.
- 457 [36] Rabbitt P, Diggle P, Holland F, McInnes L. Practice and Drop-Out Effects During a 17-Year  
458 Longitudinal Study of Cognitive Aging. *The Journals of Gerontology: Series B*. 2004;59:P84-P97.
- 459 [37] Suchy Y, Kraybill ML, Franchow E. Practice Effect and Beyond: Reaction to Novelty as an  
460 Independent Predictor of Cognitive Decline Among Older Adults. *Journal of the International*  
461 *Neuropsychological Society*. 2011;17:101-11.
- 462 [38] Thorgusén SR, Suchy Y, Chelune GJ, Baucom BR. Neuropsychological Practice Effects in the  
463 Context of Cognitive Decline: Contributions from Learning and Task Novelty. *Journal of the*  
464 *International Neuropsychological Society*. 2016;22:453-66.
- 465 [39] Evans DA, Beckett LA, Albert MS, Hebert LE, Scherr PA, Funkenstein HH, et al. Level of education  
466 and change in cognitive function in a community population of older persons. *Annals of*  
467 *Epidemiology*. 1993;3:71-7.
- 468 [40] Lyketsos CG, Chen L-S, Anthony JC. Cognitive Decline in Adulthood: An 11.5-Year Follow-Up of  
469 the Baltimore Epidemiologic Catchment Area Study. *American Journal of Psychiatry*. 1999;156:58-65.

- 470 [41] Horvat P, Richards M, Malyutina S, Pajak A, Kubinova R, Tamosiunas A, et al. Life Course  
471 Socioeconomic Position and Mid-Late Life Cognitive Function in Eastern Europe. *The Journals of*  
472 *Gerontology: Series B*. 2014;69:470-81.
- 473 [42] Turrell G, Lynch JW, Kaplan GA, Everson SA, Helkala E-L, Kauhanen J, et al. Socioeconomic  
474 Position Across the Lifecourse and Cognitive Function in Late Middle Age. *The Journals of*  
475 *Gerontology: Series B*. 2002;57:S43-S51.
- 476 [43] Marden JR, Tchetgen Tchetgen EJ, Kawachi I, Glymour MM. Contribution of Socioeconomic  
477 Status at 3 Life-Course Periods to Late-Life Memory Function and Decline: Early and Late Predictors  
478 of Dementia Risk. *American Journal of Epidemiology*. 2017;186:805-14.
- 479 [44] Tombaugh TN, McIntyre NJ. The Mini-Mental State Examination: A Comprehensive Review.  
480 *Journal of the American Geriatrics Society*. 1992;40:922-35.
- 481 [45] Proust-Lima C, Amieva H, Dartigues J-F, Jacqmin-Gadda H. Sensitivity of Four Psychometric Tests  
482 to Measure Cognitive Changes in Brain Aging-Population-based Studies. *American Journal of*  
483 *Epidemiology*. 2006;165:344-50.
- 484 [46] Terrera GM, Brayne C, Matthews F. One size fits all? Why we need more sophisticated analytical  
485 methods in the explanation of trajectories of cognition in older age and their potential risk factors.  
486 *International Psychogeriatrics*. 2010;22:291-9.
- 487  
488



489 **Figure captions**

490

491 **Figure 1.** Mean predicted trajectories for the identified classes in Whitehall II: (a) MMSE, (b)

492 phonemic fluency, (c) memory; in HRS: (d) TICS-M, (e) semantic fluency; and in Kame: (f) MMSE.

493 **Table 1. Sample descriptives at the selected baseline (n (%) or mean±s.d.).**

|                    | Whitehall II (n=5,324)                                                                                            | HRS (n=8,572)                          | Kame (n=1,413)                     |
|--------------------|-------------------------------------------------------------------------------------------------------------------|----------------------------------------|------------------------------------|
| Age                | 50-54: 1,034 (19.4%)<br>55-59: 1,644 (30.9%)<br>60-64: 1,139 (21.4%)<br>65-69: 1,062 (19.9%)<br>70-74: 445 (8.4%) | 74.70±6.64                             | 70.95±4.80                         |
| Sex                | M: 3,875 (72.8%)<br>F: 1,449 (27.2%)                                                                              | M: 3,590 (41.88%)<br>F: 4,982 (58.12%) | M: 615 (43.52%)<br>F: 798 (56.48%) |
| Years of education | 15.09±4.15                                                                                                        | 12.50±3.16                             | 13.17±2.80                         |
| MMSE               | 28.77±1.21                                                                                                        | -                                      | 26.51±2.29                         |
| Phonemic fluency   | 15.95±4.08                                                                                                        | -                                      | -                                  |
| Memory             | 6.90±2.35                                                                                                         | -                                      | -                                  |
| TICS-M             | -                                                                                                                 | 21.64±4.87                             | -                                  |
| Semantic fluency   | -                                                                                                                 | 15.15±6.50                             | -                                  |

494

**Table 2. Parameters, model fit indices and class assignment in the final LCMM models.**

|                     | Fixed effects                       | Mixture                                         | Random effects        | Covariates          | No. of latent classes | Class assignment                                   | BIC       |
|---------------------|-------------------------------------|-------------------------------------------------|-----------------------|---------------------|-----------------------|----------------------------------------------------|-----------|
| <i>Whitehall II</i> |                                     |                                                 |                       |                     |                       |                                                    |           |
| MMSE                | $\beta_0 + \beta_1 T + \beta_2 T^2$ | $\alpha_{0k} + \alpha_{1k} T + \alpha_{2k} T^2$ | $u_{0ki}$             | Age, sex, education | 3                     | 2,729 (51.26%)<br>2,407 (45.21%)<br>188 (3.53%)    | 56256.96  |
| Phonemic fluency    | $\beta_0 + \beta_1 T + \beta_2 T^2$ | $\alpha_{0k} + \alpha_{1k} T + \alpha_{2k} T^2$ | $u_{0ki} + u_{1ki} T$ | Age, sex, education | 3                     | 3,192 (59.95%)<br>97 (1.82%)<br>2,035 (38.22%)     | 98964.64  |
| Memory              | $\beta_0 + \beta_1 T + \beta_2 T^2$ | $\alpha_{0k} + \alpha_{1k} T + \alpha_{2k} T^2$ | $u_{0ki} + u_{1ki} T$ | Age, education      | 2                     | 3,219 (60.46%)<br>2,105 (39.54%)                   | 79919.54  |
| <i>HRS</i>          |                                     |                                                 |                       |                     |                       |                                                    |           |
| TICS-M              | $\beta_0 + \beta_1 T + \beta_2 T^2$ | $\alpha_{0k} + \alpha_{1k} T + \alpha_{2k} T^2$ | $u_{0ki} + u_{1ki} T$ | Age, sex, education | 3                     | 2,789 (32.54%)<br>4,420 (51.56%)<br>1,363 (15.90%) | 160218.94 |
| Semantic fluency    | $\beta_0 + \beta_1 T + \beta_2 T^2$ | $\alpha_{0k} + \alpha_{1k} T + \alpha_{2k} T^2$ | $u_{0ki} + u_{1ki} T$ | Age, sex, education | 3                     | 2,847 (33.21%)<br>5,591 (65.22%)<br>134 (1.56%)    | 182945.71 |
| <i>Kame</i>         |                                     |                                                 |                       |                     |                       |                                                    |           |
| MMSE                | $\beta_0 + \beta_1 T + \beta_2 T^2$ | $\alpha_{0k} + \alpha_{1k} T + \alpha_{2k} T^2$ | $u_{0ki} + u_{1ki} T$ | Age, sex, education | 2                     | 706 (49.96%)<br>707 (50.04%)                       | 26646.39  |

**Table 3. Associations between childhood SES indicators and the likelihood of being in a lower trajectory (with the top trajectory 'Class 1' as reference)**

| Childhood SES indicator                                      | Global cognition Class 2 |          | Global cognition Class 3 |          | Fluency Class 2 |          | Fluency Class 3 |          | Memory Class 2 |          |
|--------------------------------------------------------------|--------------------------|----------|--------------------------|----------|-----------------|----------|-----------------|----------|----------------|----------|
|                                                              | <i>B</i>                 | <i>p</i> | <i>B</i>                 | <i>p</i> | <i>B</i>        | <i>p</i> | <i>B</i>        | <i>p</i> | <i>B</i>       | <i>p</i> |
|                                                              | <i>Whitehall II</i>      |          |                          |          |                 |          |                 |          |                |          |
| Age when father finished full-time education                 | -0.06*                   | <0.0001  | -0.05                    | 0.2392   | -0.03           | 0.5568   | -0.10*          | <0.0001  | -0.08*         | <0.0001  |
| Age when mother finished full-time education                 | -0.11*                   | <0.0001  | -0.26*                   | 0.0001   | -0.11           | 0.1057   | -0.18*          | <0.0001  | -0.14*         | <0.0001  |
| Father's social class                                        | -0.11*                   | 0.0001   | -0.24*                   | 0.0017   | -0.12           | 0.2589   | -0.16*          | <0.0001  | -0.10*         | 0.0003   |
| Spent four or more weeks in hospital                         | 0.14                     | 0.1126   | 0.13                     | 0.5800   | 0.46            | 0.1098   | 0.38*           | <0.0001  | 0.35*          | <0.0001  |
| Father/mother were unemployed when they wanted to be working | 0.31*                    | 0.0010   | 0.59*                    | 0.0082   | -0.68           | 0.1420   | 0.13            | 0.1629   | 0.27*          | 0.0031   |
| Family had continuing financial problems                     | 0.17*                    | 0.0073   | 0.36*                    | 0.0309   | 0.15            | 0.5305   | 0.29*           | <0.0001  | 0.31*          | <0.0001  |
| Family/household did not have an inside toilet               | 0.36*                    | <0.0001  | 0.74*                    | <0.0001  | 0.40            | 0.0973   | 0.50*           | <0.0001  | 0.43*          | <0.0001  |
| Family/household owned a car                                 | -0.60*                   | <0.0001  | -1.28*                   | <0.0001  | -0.65*          | 0.0028   | -0.97*          | <0.0001  | -0.95*         | <0.0001  |
| <i>HRS</i>                                                   |                          |          |                          |          |                 |          |                 |          |                |          |
| Father's education                                           | -0.12*                   | <0.0001  | -0.27*                   | <0.0001  | -0.14*          | <0.0001  | -0.07           | 0.1023   |                |          |
| Mother's education                                           | -0.14*                   | <0.0001  | -0.32*                   | <0.0001  | -0.16*          | <0.0001  | -0.14*          | 0.0009   |                |          |
| Childhood health                                             | -0.20*                   | <0.0001  | -0.45*                   | <0.0001  | -0.24*          | <0.0001  | -0.08           | 0.3850   |                |          |
| Family financially poor                                      | 0.50*                    | <0.0001  | 0.82*                    | <0.0001  | 0.48*           | <0.0001  | 0.32            | 0.0881   |                |          |
| Family moved due to financial difficulties                   | 0.30*                    | <0.0001  | 0.33*                    | 0.0001   | 0.14*           | 0.0210   | 0.29            | 0.1856   |                |          |
| Family received help because of financial difficulties       | -0.01                    | 0.8708   | -0.19                    | 0.0745   | -0.20*          | 0.0036   | -0.07           | 0.7791   |                |          |
| Father unemployed                                            | 0.32*                    | <0.0001  | 0.37*                    | <0.0001  | 0.28*           | <0.0001  | 0.25            | 0.2458   |                |          |
| <i>Kame</i>                                                  |                          |          |                          |          |                 |          |                 |          |                |          |
| Father's education                                           | -0.09*                   | <0.0001  |                          |          |                 |          |                 |          |                |          |
| Mother's education                                           | -0.10*                   | <0.0001  |                          |          |                 |          |                 |          |                |          |
| Household density                                            | 0.07                     | 0.1734   |                          |          |                 |          |                 |          |                |          |
| Urban/suburban living                                        | -0.41*                   | 0.0003   |                          |          |                 |          |                 |          |                |          |
| Family financial difficulties                                | 0.04                     | 0.0556   |                          |          |                 |          |                 |          |                |          |

\* *FDR* < 0.05

(a) Class-specific mean predicted trajectory

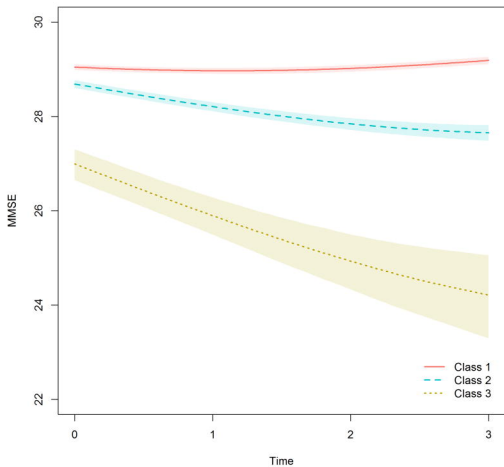

(b) Class-specific mean predicted trajectory

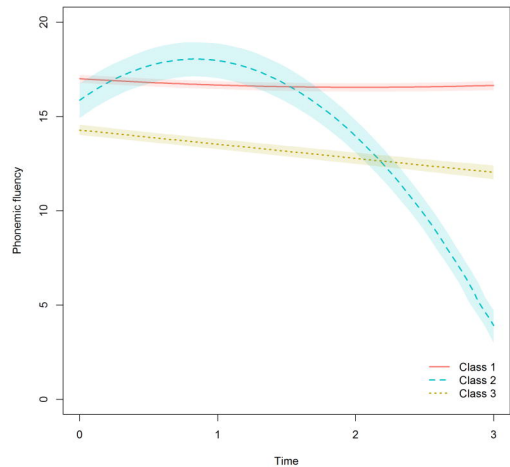

(c) Class-specific mean predicted trajectory

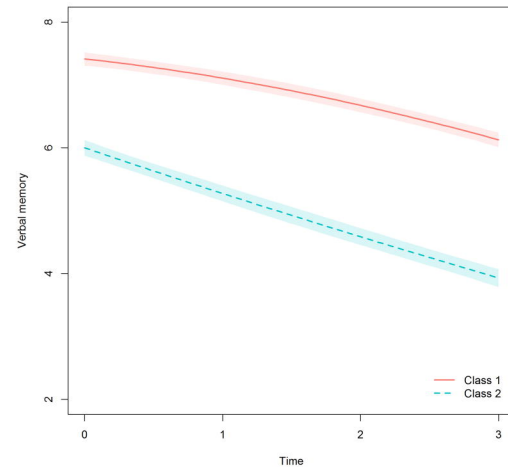

(d) Class-specific mean predicted trajectory

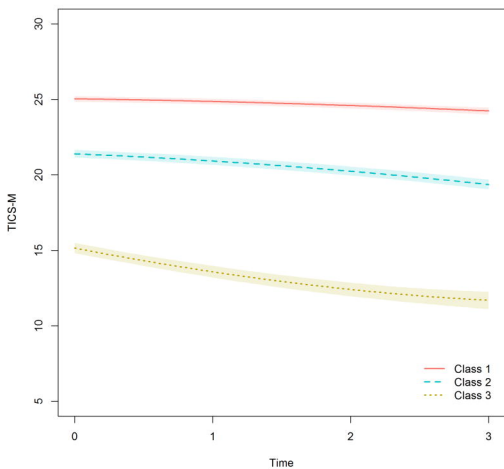

(e) Class-specific mean predicted trajectory

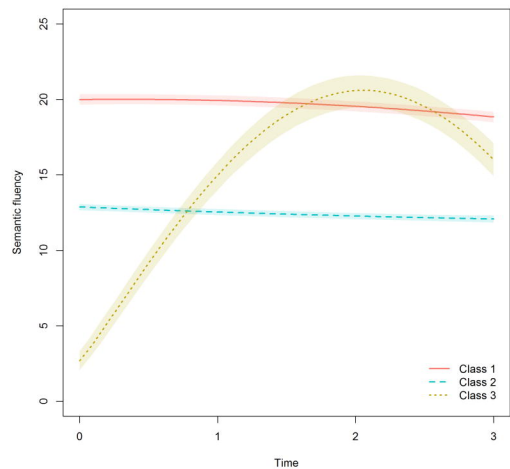

(f) Class-specific mean predicted trajectory

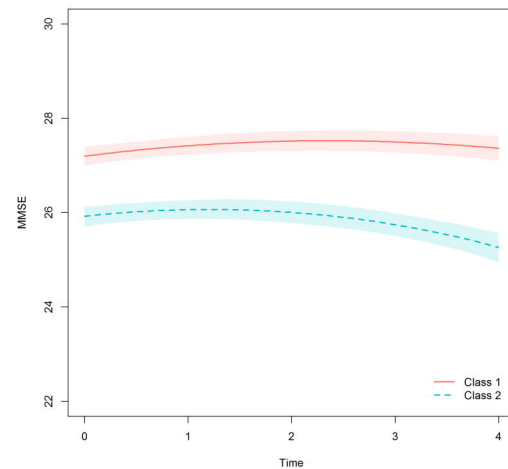

Source: https://www.biorxiv.org/content/10.1101/2021.06.10.447842v1.full.pdf
